# Supplementary material for: Investigating the Challenges and Benefits of Engaging in Peer Support via Videoconferencing for People with Spinal Cord Injury
Source: MDPI journal article supplement (doi:10.3390/ijerph19084585), 2022-04-11
Supplement: s1 [file s1]

## **Supplementary File**

Survey questions for: Investigating the challenges and benefits of engaging in peer support via videoconferencing for people with spinal cord injury.

### **1.What is your gender?**

Female

Male

Other

Prefer not to say

### **2. What is your age range?**

18 – 30 years of age

30 – 39 years

40 – 49 years

50 – 59 years

60 – 69 years

70 – 79 years

Over 80 years

### **3. Which of the following best describes your level and type of injury?**

High quadriplegia/tetraplegia – significant involvement of upper limbs, fully dependent on carers for self care

Quadriplegia/tetraplegia –involvement of upper limbs, need some/full assistance from carers for self care

Quadriplegia/tetraplegia –involvement of upper limbs, fully independent in self care

Paraplegia – no involvement of upper limbs, require a wheelchair and some assistance with self care

Paraplegia – no involvement of upper limbs, can walk short distances, independent with self care

Paraplegia – no involvement of upper limbs, able to walk, independent with self care

### **4. What is the highest level of education you attained?**

Year 10 secondary school

Year 11 or 12 secondary school

TAFE course

University degree

Higher degree (masters or doctoral level)

**5. Which of the following best describes your employment situation?**

Employed part time

Employed full time

Student

Retired

Not seeking employment

Self-employed/own business

Tick all that apply.

Other \_\_\_\_\_

**6. Who do you live with?**

Alone

Parents

Partner/spouse

Other

**7. What best describes your housing situation?**

Own home with no mortgage

Own home with mortgage

Home owned by someone else (e.g. parents)

Renting

Residential care

Assisted living arrangement (eg paid carers on site)

**8. Do you receive funding from any of the following?**

Transport accident insurance

Work insurance

NDIS (Australia)

MyAgedCare (Australia)

Other

**9. Do you have a paid personal carer?**

Yes

No

**10. Do you have a therapist that sees you regularly?**

Yes

If yes, please specify type \_\_\_\_\_

No

**11. On a scale of 1- 3 please select your experience with videoconferencing prior to COVID**

1 – No experience

2 – Some experience

3 – A great deal of experience

**12. On a scale of 1-5 please select your usual level of comfort with technology**

1- Very uncomfortable

2- Somewhat uncomfortable

3- Neutral

4- Somewhat comfortable

5- Very comfortable

**13. Please indicate if you have used any of the following platforms or programs:**

Skype: Yes/No

Zoom: Yes/No

Google hangouts: Yes/No

Microsoft teams: Yes/No

FaceTime: Yes/No

Facebook Messenger: Yes/No

Whatsapp: Yes/No

Viber: Yes/No

Other \_\_\_\_\_

**14. How would you rate your experience using videoconferencing for peer support?**

1- Very poor

2- Somewhat poor

3- Neutral

4- Somewhat successful

5- Very successful

**15. Did you need assistance to get set up?**

Yes

No

**16. If yes, who helped you?**

Family member

Service provider/therapist

Personal care assistant

Other \_\_\_\_\_

**17. What were the positive aspects of using videoconferencing for peer support?**

Enabled me to connect when otherwise I couldn't

Convenient as I didn't have to leave the house

New skill and format of communication I haven't previously tried

Convenient as I could pick the time

Other \_\_\_\_\_  
\_\_\_\_\_

**18. What were the challenges/barriers of using videoconferencing for peer support?**

Wifi/internet connection issues

Needing help to get set up

Cost

Learning new platform/program

Inconsistencies between platforms/programs

Not getting non-verbal feedback from other person

Other \_\_\_\_\_  
\_\_\_\_\_

**19. On a scale of 1-5, how did it compare with face to face/in person support?**

1- Compared very poorly

2- Compared somewhat poorly

3- Neutral

4- Compared somewhat well

5- Compared very well

**20. Did using videoconferencing help you to feel socially connected?**

Yes

No

**21. Was the person you were getting peer support from a new person or someone you already knew?**

Someone new

Someone I knew already

Other \_\_\_\_\_

**What do you think were the advantages/disadvantages of this?**

---

---

**22. Are there other comments you would like to make?**

---

---
